# Supplementary material for: A high spatial resolution synchrotron Mössbauer study of the Tazewell IIICD and Esquel pallasite meteorites
Source: PubMed Central journal article supplement (PMC5488627; doi:10.1111/maps.12841), 2017-03-15
Supplement: MAPS-52-925-s005.pdf [file MAPS-52-925-s005.pdf]

80  $\mu\text{m}$

Kamacite

Martensite

Plessite

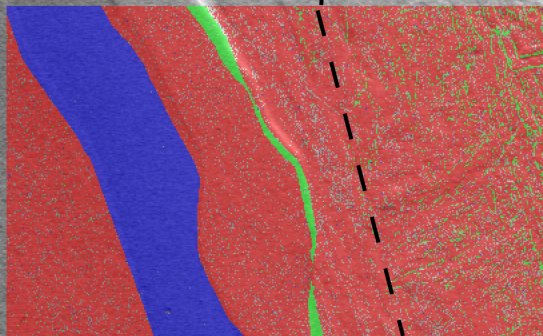

Schreibersite
