# Supplementary material for: A high spatial resolution synchrotron Mössbauer study of the Tazewell IIICD and Esquel pallasite meteorites
Source: PubMed Central journal article supplement (PMC5488627; doi:10.1111/maps.12841), 2017-03-15

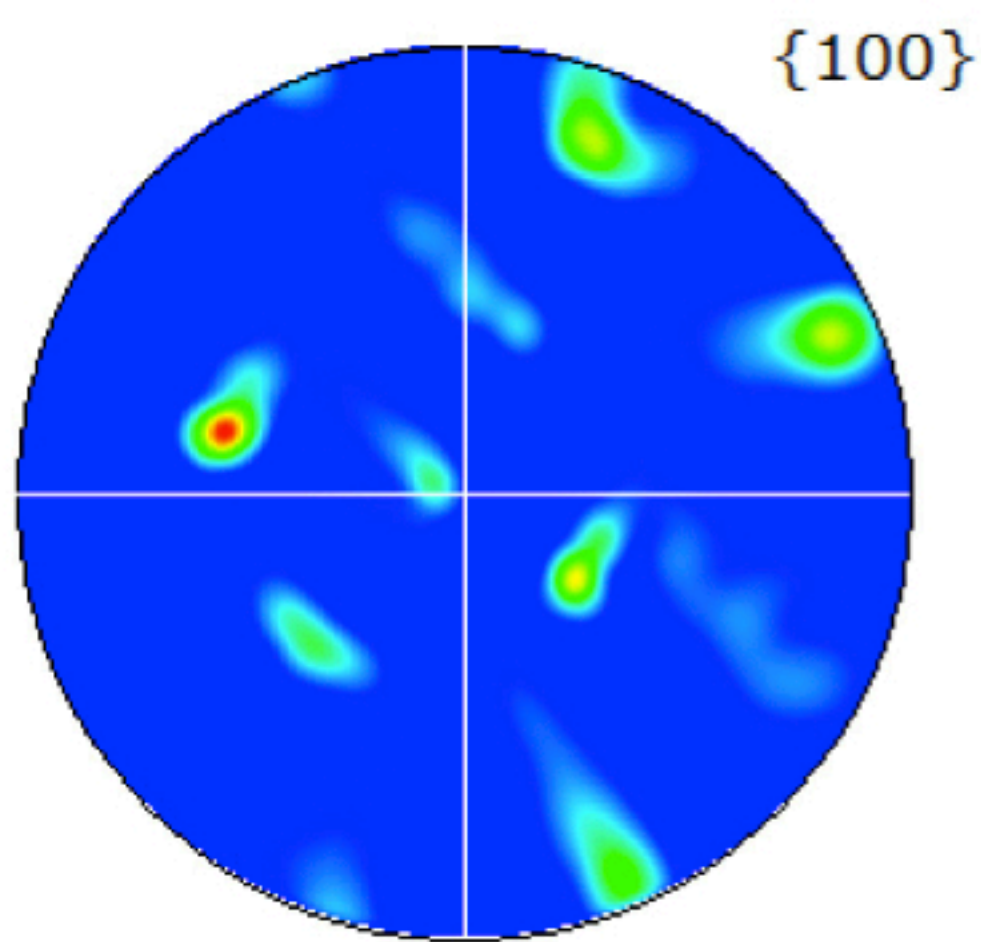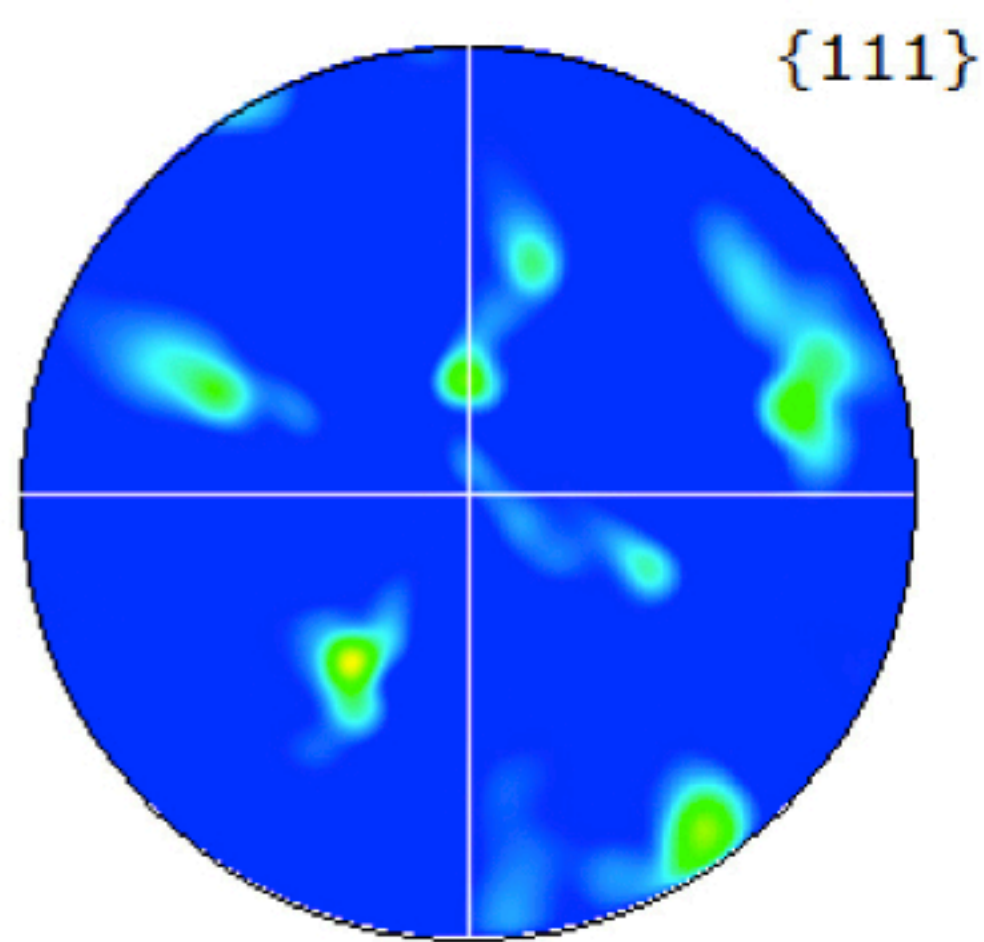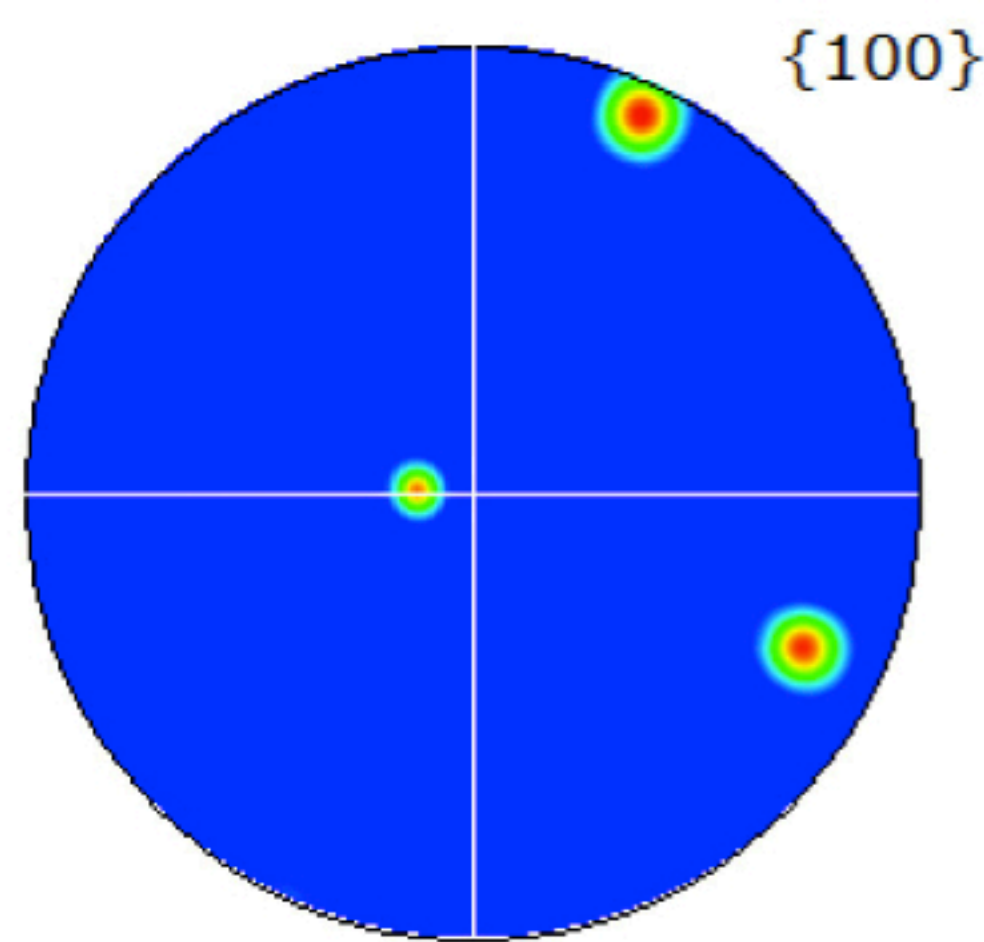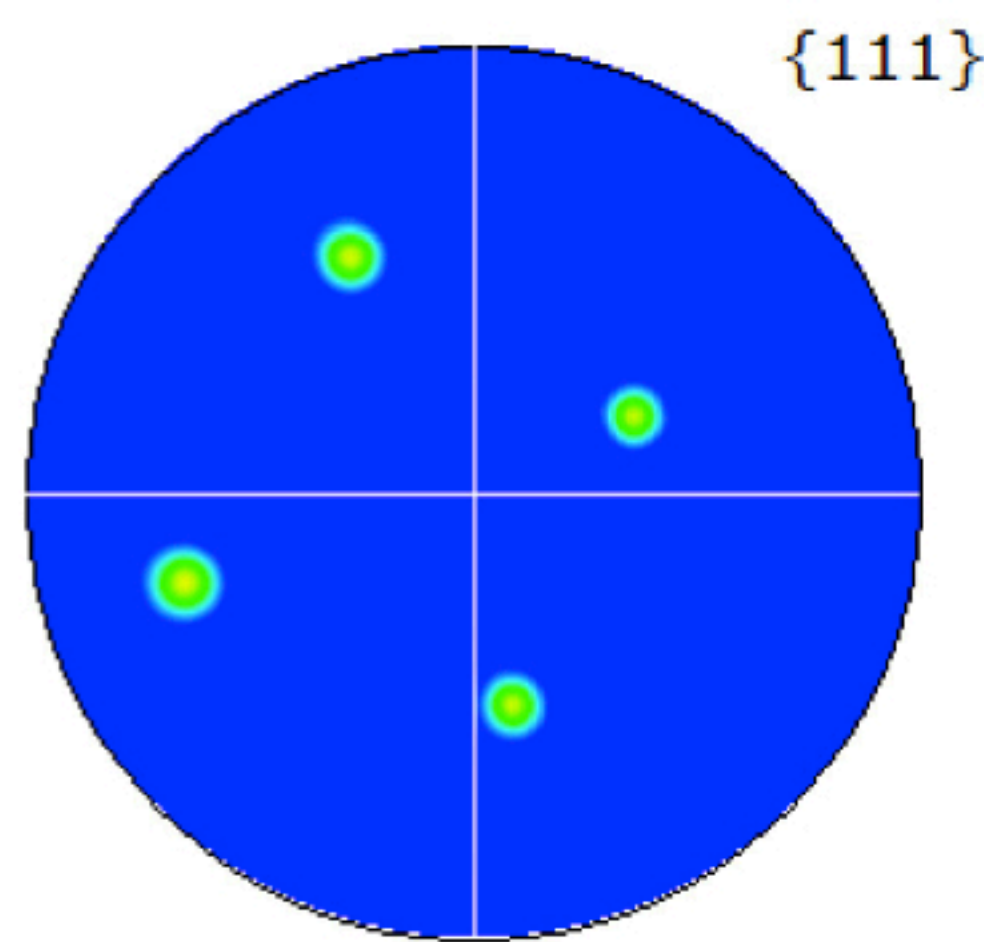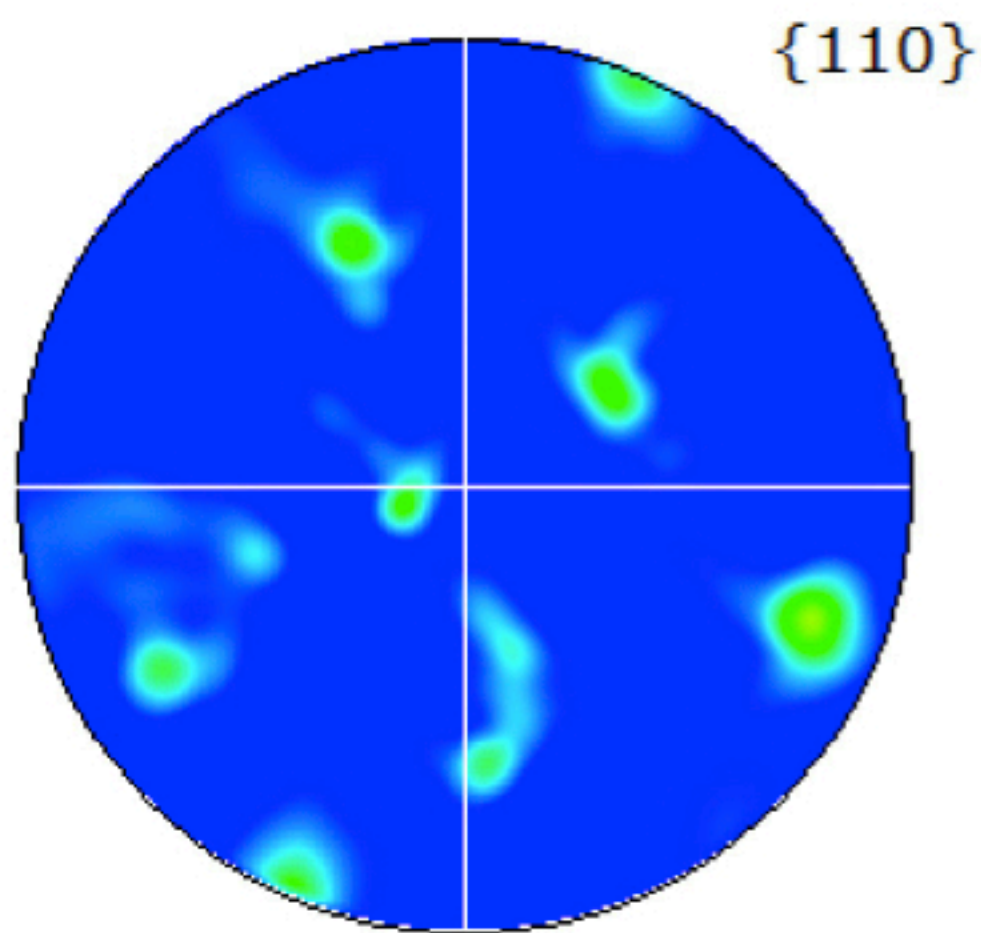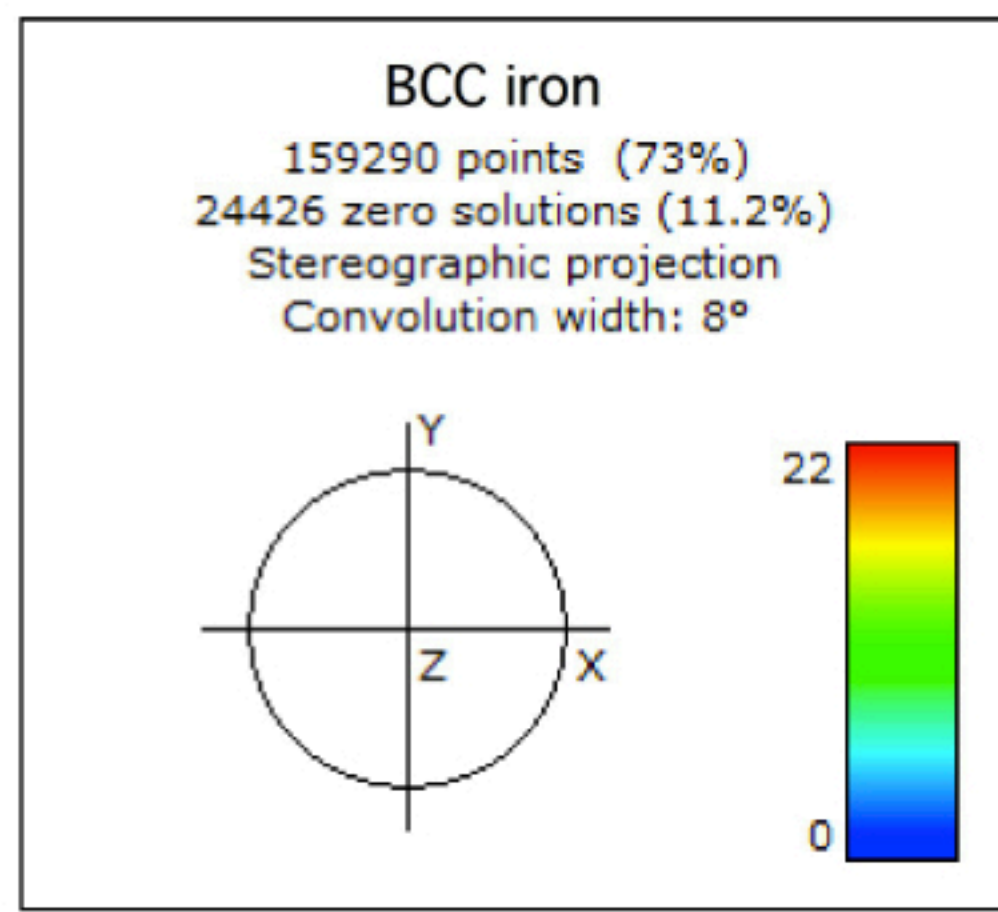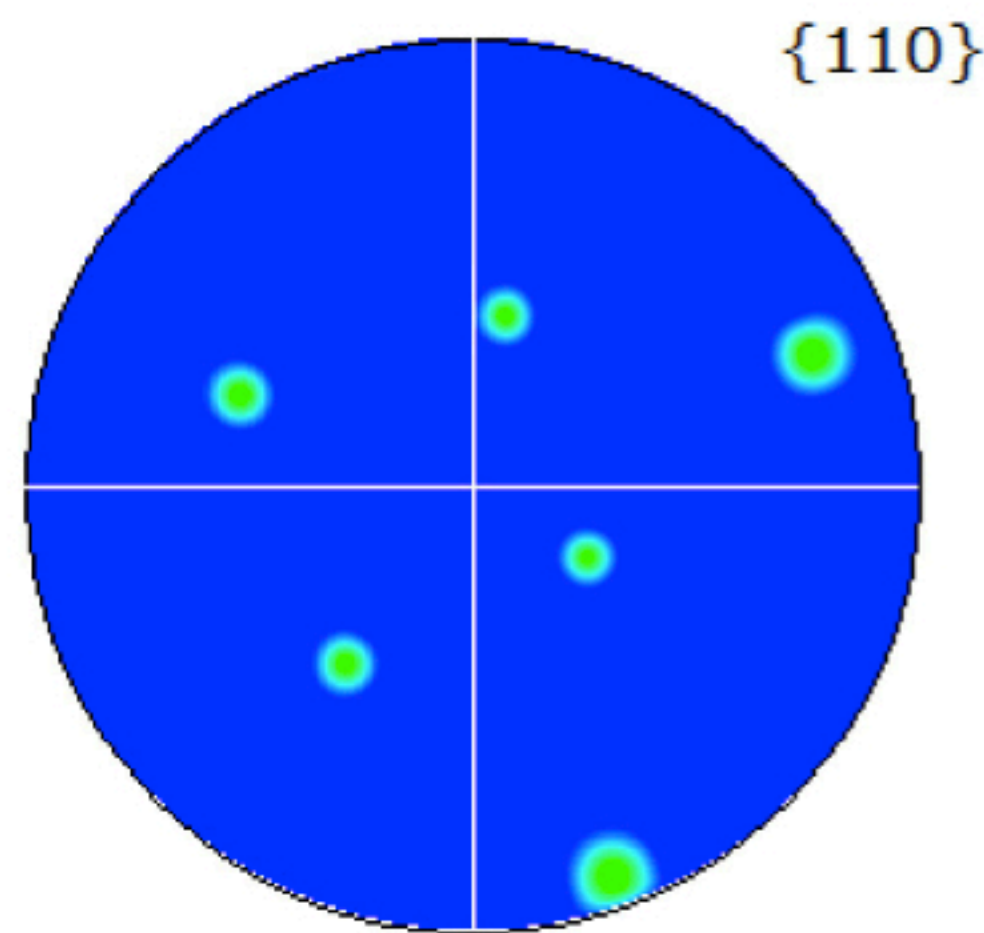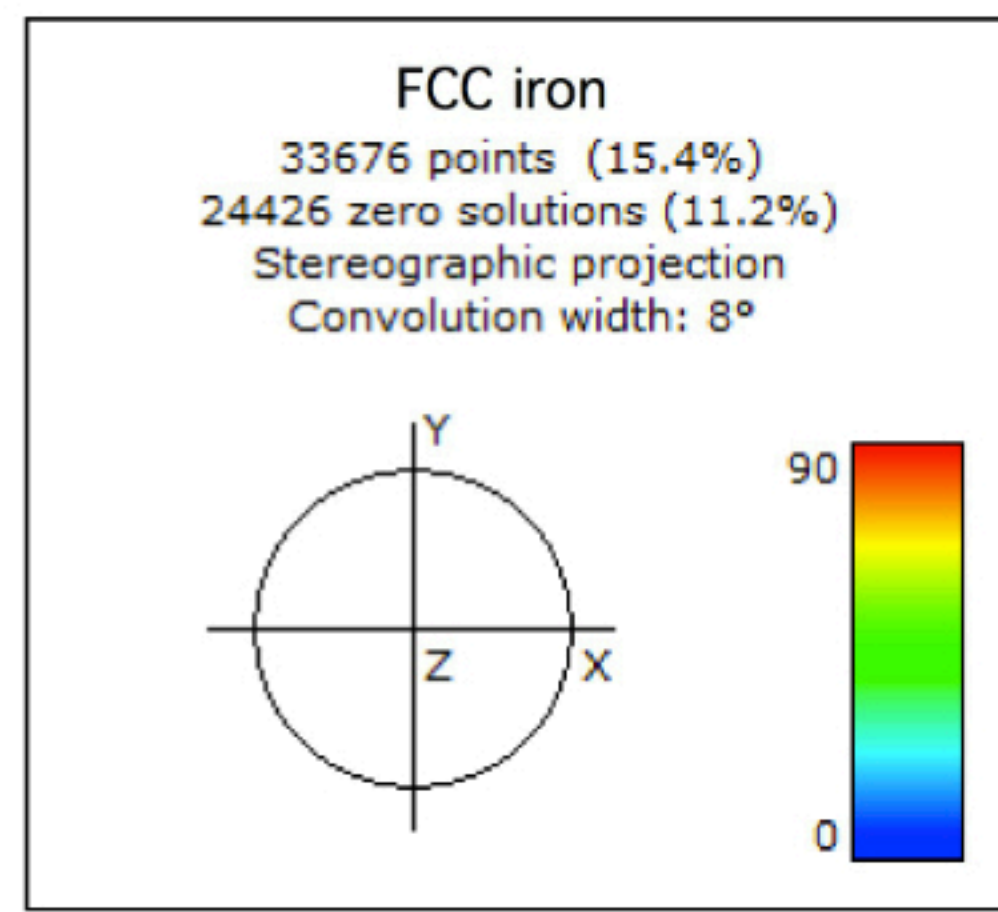

Supplement: MAPS-52-925-s007.pdf [file MAPS-52-925-s007.pdf]
