# Supplementary material for: A high spatial resolution synchrotron Mössbauer study of the Tazewell IIICD and Esquel pallasite meteorites
Source: PubMed Central journal article supplement (PMC5488627; doi:10.1111/maps.12841), 2017-03-15
Supplement: MAPS-52-925-s010.pdf [file MAPS-52-925-s010.pdf]

## Iron FCC

$\varphi_1: 0^\circ$    $360^\circ$

$\Phi: 0^\circ$    $90^\circ$

$\varphi_2: 0^\circ$    $360^\circ$

## Iron BCC

$\varphi_1: 0^\circ$    $360^\circ$

$\Phi: 0^\circ$    $90^\circ$

$\varphi_2: 0^\circ$    $360^\circ$

## Schreibersite

$\varphi_1: 0^\circ$    $360^\circ$

$\Phi: 0^\circ$    $90^\circ$

$\varphi_2: 0^\circ$    $360^\circ$
